# Supplementary material for: Feasibility and Educational Value of a Student-Run Pharmacovigilance Programme: A Prospective Cohort Study
Source: PubMed Central journal article supplement — Drug Saf. 2017 Jan 25;40(5):409–18. doi: 10.1007/s40264-016-0502-1 (PMC5384963; doi:10.1007/s40264-016-0502-1), 2017-01-25
Supplement: 40264_2016_502_MOESM1_ESM.pdf [file 40264_2016_502_MOESM1_ESM.pdf]

## Electronic Supplementary Material 1 – Questionnaires

### Feasibility and educational value of a student-run pharmacovigilance programme – a prospective cohort study

Tim Schutte<sup>1,2</sup>, Jelle Tichelaar<sup>1,2</sup>, Michael O. Reumerman<sup>1</sup>, Rike van Eekeren<sup>3,4,5</sup>, Leàn Rolfes<sup>3,4,5</sup>  
Eugène P. van Puijenbroek<sup>3,4,5</sup>, Milan C. Richir<sup>1,2</sup>, Michiel A. van Agtmael<sup>1,2</sup>

1 Department of Internal Medicine, Section Pharmacotherapy, VU University Medical Center, Amsterdam, the Netherlands

2 RECIPE (Research & Expertise Center In Pharmacotherapy Education), Amsterdam, the Netherlands

3 Netherlands Pharmacovigilance Centre Lareb, 's-Hertogenbosch, the Netherlands

4 Pharmacotherapy, -Epidemiology and -Economics — Groningen Research Institute of Pharmacy, University of Groningen, Groningen, The Netherlands.

5 WHO Collaborating Centre for Pharmacovigilance in Education

**Corresponding author:** Tim Schutte, [t.schutte@vumc.nl](mailto:t.schutte@vumc.nl)  
Department of Internal Medicine, Section Pharmacotherapy,  
De Boelelaan 1117, 1081 HZ, Amsterdam, the Netherlands  
room ZH4A50, Phone +31 20 4448090

## Feasibility and educational value of a student-run pharmacovigilance programme – T. Schutte et al.

| Question                                                                                                         | Answer option                     |
|------------------------------------------------------------------------------------------------------------------|-----------------------------------|
| 1. If you suspect a patient to have an adverse drug reaction, how would you act?                                 | Open question                     |
| 2. I know where to report an ADR (in the Netherlands)?                                                           | yes / no (if yes, please specify) |
| 3. I know which essential information is needed for a qualitative good ADR-report.                               | yes / no                          |
| 4. I know how an ADR-report is handled by the Dutch pharmacovigilance center Lareb.                              | yes / no                          |
| 5. I know how a ADR-reports are used after the Dutch pharmacovigilance center Lareb has handled the ADR-reports. | yes / no                          |
| 6. I know why ADR's should be reported to the Dutch pharmacovigilance center Lareb.                              | yes / no                          |

**Table ESM 1-1:** Student pre-participation e-questionnaire, comprising 6 questions.

| Question                                                                                             | Answer option                                                  |
|------------------------------------------------------------------------------------------------------|----------------------------------------------------------------|
| 1. Was the assessment was scientifically sound?                                                      | 5 point Likert scale (1: strongly disagree - 5 strongly agree) |
| 2. Was the assessment was useful?                                                                    | 5 point Likert scale (1: strongly disagree - 5 strongly agree) |
| 3. The assessment lacked relevant information.                                                       | yes / no (if yes, please specify)                              |
| 4. The assessment consisted inaccuracies.                                                            | yes / no (if yes, please specify)                              |
| 5. The time I spent on this ADR report was ... compared to self-handeling the entire ADR-assessment. | 5 point Likert scale (much less - 5 much more)                 |
| 6. Overall rating of entire student ADR-assessment.                                                  | Mark 1-10 (1 (min) - 10 (max) )                                |

**Table ESM 1-2:** Lareb supervisor e-questionnaire, comprising 6 questions.

| Question                                                                                                                               | Answer option                                                                                              |                                                                               |
|----------------------------------------------------------------------------------------------------------------------------------------|------------------------------------------------------------------------------------------------------------|-------------------------------------------------------------------------------|
| 1. If you suspect a patient to have an adverse drug reaction, how would you act?                                                       | Open question                                                                                              |                                                                               |
| 2. I know where to report an ADR (in the Netherlands)?                                                                                 | yes / no (if yes, please specify)                                                                          |                                                                               |
| 3. I know which essential information is needed for a qualitative good ADR-report.                                                     | yes / no (if yes, please specify)                                                                          |                                                                               |
| 4. I have previously reported an ADR tot the Dutch pharmacovigilance center Lareb.                                                     | yes / no                                                                                                   |                                                                               |
| 5. Could you indicate how likely it is you will report an ADR to the Dutch pharmacovigilance center Lareb in the following situations: | I intend to report serious ADRs that I will encounter to the competent authority.                          | 7 point Likert scale (1: extremely unlikely - 7 extremely likely)             |
|                                                                                                                                        | I intend to report unknown ADRs that I will encounter to the competent authority.                          |                                                                               |
|                                                                                                                                        | I intend to report all ADRs that I will encounter to the competent authority.                              |                                                                               |
| 6. How likely do you think the following outcomes will be if you report an ADR to the Dutch pharmacovigilance center Lareb?            | It contributes to the safe use of medicines.                                                               | 7 point Likert scale (1: extremely unlikely - 7 extremely likely)             |
|                                                                                                                                        | Improves patient safety.                                                                                   |                                                                               |
|                                                                                                                                        | Educates others about drug risks.                                                                          |                                                                               |
|                                                                                                                                        | Personally beneficial.                                                                                     |                                                                               |
|                                                                                                                                        | Time consuming to report.                                                                                  |                                                                               |
|                                                                                                                                        | Disrupts the normal workflow.                                                                              |                                                                               |
|                                                                                                                                        | Increases risk of malpractice.                                                                             |                                                                               |
| Breaks trust with patients.                                                                                                            |                                                                                                            |                                                                               |
| 7. What are the correct answers to the following statements?                                                                           | I know how an ADR-report is handled by the Dutch pharmacovigilance center Lareb.                           | yes / no                                                                      |
|                                                                                                                                        | I know how assessed ADR-reports are used by the Dutch pharmacovigilance center Lareb.                      |                                                                               |
|                                                                                                                                        | I know why ADR's should be reported to the Dutch pharmacovigilance center Lareb.                           |                                                                               |
|                                                                                                                                        | All ADRs, irrespective of severity, are obliged to be reported.                                            |                                                                               |
|                                                                                                                                        | Medical doctors should report serious ADEs even if uncertain that product caused the event.                |                                                                               |
|                                                                                                                                        | Medical doctors should report serious ADEs even if do not have all details of event.                       |                                                                               |
|                                                                                                                                        | All serious ADRs are known before a drug is marketed.                                                      |                                                                               |
|                                                                                                                                        | Lareb does not disclose ADR reporter's identity.                                                           |                                                                               |
|                                                                                                                                        | One can report ADRs anonymously to Lareb.                                                                  |                                                                               |
|                                                                                                                                        | Adverse experiences with cosmetics & special nutritional products may be reported to Lareb.                |                                                                               |
|                                                                                                                                        | One case reported by a doctor does not contribute much to knowledge on drug risks.                         |                                                                               |
|                                                                                                                                        | With my present knowledge, I am very well prepared to report any ADRs in my future practice.               |                                                                               |
|                                                                                                                                        | Medical students can report ADRs to Lareb.                                                                 |                                                                               |
| Patients can report ADRs independent from a healthcare professional.                                                                   |                                                                                                            |                                                                               |
| I know what pharmacovigilance means.                                                                                                   |                                                                                                            |                                                                               |
| 8. What is the meaning of "The black triangle" on the packaging of medication?                                                         | Open question                                                                                              |                                                                               |
| 9. Which sources can I consult when I encounter a possible ADR in one of my patients?                                                  | Open question                                                                                              |                                                                               |
| 10. What is the meaning of the terms: positive dechallenge and positive rechallenge?                                                   | Open question                                                                                              |                                                                               |
| 11. Which patient bound factor can play a role in the development of an ADR?                                                           | Open question                                                                                              |                                                                               |
| 12. What have you learned by participating in the SR-LC-PP?                                                                            | Open question                                                                                              |                                                                               |
| 13. Statements concerning educational value of the LC-SR-PP.                                                                           | I found assessing ADR reports educational.                                                                 | 5 point Likert scale (1: strongly disagree - 5 strongly agree)                |
|                                                                                                                                        | I felt responsible for assessing the ADR-reports.                                                          |                                                                               |
|                                                                                                                                        | Learning by doing (by assessing the ADR-reports) is more pleasurable than learning with fictive casuistry. |                                                                               |
|                                                                                                                                        | Learning by doing (by assessing the ADR-reports) is more instructive than learning with fictive casuistry. |                                                                               |
|                                                                                                                                        | Assessing ADR-reports should be added to the current medical curriculum.                                   |                                                                               |
|                                                                                                                                        | There should be more pharmacovigilance education in the current medical curriculum.                        |                                                                               |
| 14. Assessing the ADR-reports on average cost me ...                                                                                   | Pharmacovigilance is covered well in the current medical curriculum.                                       | 0-1 hours, 1-2 hours, 2-3 hours, 3-4 hours, 4-5 hours, 5-6 hours or >6 hours. |
| 15. Statements concerning organization of the LC-SR-PP.                                                                                | I had enough time to assess the ADR-reports.                                                               | 5 point Likert scale (1: strongly disagree - 5 strongly agree)                |
|                                                                                                                                        | Assessing the ADR-reports could easily be combined with the regular curriculum.                            |                                                                               |

**Table ESM 1-3:** Student post-participation e-questionnaire, comprising 15 questions.
