# Supplementary material for: Feasibility and Educational Value of a Student-Run Pharmacovigilance Programme: A Prospective Cohort Study
Source: PubMed Central journal article supplement — Drug Saf. 2017 Jan 25;40(5):409–18. doi: 10.1007/s40264-016-0502-1 (PMC5384963; doi:10.1007/s40264-016-0502-1), 2017-01-25
Supplement: 40264_2016_502_MOESM2_ESM.pdf [file 40264_2016_502_MOESM2_ESM.pdf]

## Electronic Supplementary Material 2 – Additional results

### Feasibility and educational value of a student-run pharmacovigilance programme – a prospective cohort study

Tim Schutte<sup>1,2</sup>, Jelle Tichelaar<sup>1,2</sup>, Michael O. Reumerman<sup>1</sup>, Rike van Eekeren<sup>3,4,5</sup>, Leàn Rolfes<sup>3,4,5</sup>  
Eugène P. van Puijenbroek<sup>3,4,5</sup>, Milan C. Richir<sup>1,2</sup>, Michiel A. van Agtmael<sup>1,2</sup>

1 Department of Internal Medicine, Section Pharmacotherapy, VU University Medical Center, Amsterdam, the Netherlands

2 RECIPE (Research & Expertise Center In Pharmacotherapy Education), Amsterdam, the Netherlands

3 Netherlands Pharmacovigilance Centre Lareb, 's-Hertogenbosch, the Netherlands

4 Pharmacotherapy, -Epidemiology and -Economics — Groningen Research Institute of Pharmacy, University of Groningen, Groningen, The Netherlands.

5 WHO Collaborating Centre for Pharmacovigilance in Education

**Corresponding author:** Tim Schutte, [t.schutte@vumc.nl](mailto:t.schutte@vumc.nl)  
Department of Internal Medicine, Section Pharmacotherapy,  
De Boelelaan 1117, 1081 HZ, Amsterdam, the Netherlands  
room ZH4A50, Phone +31 20 4448090

## Feasibility and educational value of a student-run pharmacovigilance programme – T. Schutte et al.

| Baseline characteristics of participating students        |                              |                   |                    |
|-----------------------------------------------------------|------------------------------|-------------------|--------------------|
|                                                           |                              | Pre-participation | Post-participation |
|                                                           | <b>Respondents</b>           | 31                | 32                 |
| <b>Sex</b>                                                | <b>Female</b>                | 22 (71.0%)        | 25 (78.1%)         |
|                                                           | <b>Male</b>                  | 9 (29.0%)         | 7 (21.9%)          |
| <b>In which year of medical school are you?</b>           |                              |                   |                    |
|                                                           | <b>1st year (Bachelor 1)</b> | 8 (25.8%)         | 2 (6.2%)           |
|                                                           | <b>2nd year (Bachelor 2)</b> | 6 (19.3%)         | 7 (21.9%)          |
|                                                           | <b>3rd year (Bachelor 3)</b> | 14 (45.2%)        | 14 (43.8%)         |
|                                                           | <b>4th year (Master 1)</b>   | 3 (9.7%)          | 8 (25.0%)          |
|                                                           | <b>5th year (Master 2)</b>   | -                 | 1 (3.1%)           |
|                                                           | <b>6th year (Master 3)</b>   | -                 | -                  |
| <b>Have you reported an adverse drug reaction before?</b> |                              |                   |                    |
|                                                           | <b>No</b>                    |                   | 26 (81.3%)         |
|                                                           | <b>Yes</b>                   |                   | 6 (18.7%)          |

**Table S2-1:** Baseline characteristics (pre- and post-participation e-questionnaire).

| Skills and knowledge concerning reporting adverse drug reactions (after).                          |                   |                                     |                                          |
|----------------------------------------------------------------------------------------------------|-------------------|-------------------------------------|------------------------------------------|
| Items students mentioned as being necessary for a qualitatively good ADR report.                   |                   |                                     |                                          |
|                                                                                                    | Respondents % (n) |                                     | Respondents % (n)                        |
| Patient information (general)                                                                      | 34.5% (10)        | <b>Start date of suspected drug</b> | 37.9% (11)                               |
| Age / Sex                                                                                          | 48.3% (14)        | <b>Stop date of suspected drug</b>  | 24.1% (7)                                |
| Weight/Length                                                                                      | 17.2% (5)         | <b>Description of the ADR</b>       | 62.1% (18)                               |
| Patient history                                                                                    | 48.3% (14)        | <b>Start date of the ADR</b>        | 27.6% (8)                                |
| Comedication                                                                                       | 72.4% (21)        | <b>Stop date of the ADR</b>         | 10.3% (3)                                |
| Comorbidity                                                                                        | 24.1% (7)         | <b>Latency time</b>                 | 24.1% (7)                                |
| Additional information                                                                             | 17.2% (5)         | <b>Action taken</b>                 | 17.2% (5)                                |
| Suspected drug                                                                                     | 37.9% (11)        | <b>Outcome</b>                      | 17.2% (5)                                |
|                                                                                                    |                   |                                     |                                          |
|                                                                                                    |                   |                                     | Respondents % (n)                        |
| Summary of product characteristics (SmPC)                                                          |                   |                                     | 60.7% (17)                               |
| Farmacotherapeutisch Kompas                                                                        |                   |                                     | 57.1% (16)                               |
| Netherlands Pharmacovigilance Centre Lareb                                                         |                   |                                     | 50.0% (14)                               |
| Pubmed                                                                                             |                   |                                     | 28.6% (8)                                |
| Micromedex solutions©                                                                              |                   |                                     | 14.3% (4)                                |
| Other sources                                                                                      |                   |                                     | 7.1% (2)                                 |
|                                                                                                    |                   |                                     |                                          |
|                                                                                                    |                   |                                     | Respondents % (n)<br>with correct answer |
| All ADRs, irrespective of severity, must be reported (*No)                                         |                   |                                     | 72.4% (21)                               |
| Medical doctors should report serious ADEs even if uncertain that product caused the event (*Yes)  |                   |                                     | 96.6% (28)                               |
| Medical doctors should report serious ADEs even if do not have all details of event (*Yes)         |                   |                                     | 86.2% (25)                               |
| All serious ADRs are known before a drug is marketed (*No)                                         |                   |                                     | 89.7% (26)                               |
| Lareb does not disclose ADR reporter's identity (*Yes)                                             |                   |                                     | 93.1% (27)                               |
| One can report ADRs anonymously to Lareb (*Yes)                                                    |                   |                                     | 93.1% (27)                               |
| Medical students can report ADRs to Lareb (*Yes)                                                   |                   |                                     | 75.9% (22)                               |
| Patients can report ADRs independent of a health professional (*Yes)                               |                   |                                     | 75.9% (22)                               |
| Adverse experiences with cosmetics and special nutritional products may be reported to Lareb (*No) |                   |                                     | 86.2% (25)                               |
| One case reported by a doctor does not contribute much to knowledge on drug risks (*No)            |                   |                                     | 86.2% (25)                               |
| I know what pharmacovigilance means (*Yes)                                                         |                   |                                     | 51.7% (15)                               |
|                                                                                                    |                   |                                     |                                          |
| I know the meaning of: The black triangle (*Correct)                                               |                   |                                     | 37.9% (11)                               |
| I know the meaning of: Dechallenge and Rechallenge (*Correct)                                      |                   |                                     | 69.0% (20)                               |

**Table S2-2,** Students' skills and knowledge concerning the reporting of adverse drug reactions (ADRs) (cross-sectional). Upper table: Items students considered necessary for a qualitatively good ADR report. Middle table: Resources students would consult when encountering an ADR. Lower table: Percentage of correctly answered questions concerning pharmacology and pharmacovigilance.
